# Supplementary material for: No Evidence of an Association Between Efavirenz Exposure and Suicidality Among HIV Patients Initiating Antiretroviral Therapy in a Retrospective Cohort Study of Real World Data
Source: PubMed Central journal article supplement — Medicine (Baltimore). 2016 Jan 22;95(3):e2480. doi: 10.1097/MD.0000000000002480 (PMC4998256; doi:10.1097/md.0000000000002480), 2016-01-22
Supplement: medi-95-e2480-s001.pdf [file medi-95-e2480-s001.pdf]

## **No Evidence of an Association Between Efavirenz Exposure and Suicidality Among HIV Patients Initiating Antiretroviral Therapy in a Real-World Data Analysis**

*Ella T. Nkhoma, PhD, MPH, John Coumbis, MD, MSPH, Amanda M. Farr, MPH, Stephen S. Johnston, MA, Bong Chul Chu, PhD, Lisa C. Rosenblatt, MD, MPH, Daniel Seekins, MD, and Angelina Villasis-Keever, MD, MSc*

### **Supplemental Digital Content**

**Supplemental Table 1.** Cohort Selection Attrition

|                                                                            | <b>Commercial<br/>Database, <i>n</i> (%)</b> | <b>Medicaid<br/>Database, <i>n</i> (%)</b> |
|----------------------------------------------------------------------------|----------------------------------------------|--------------------------------------------|
| Patients with $\geq 1$ prescription fill for an HIV-related ARV medication | 90,086 (100.0)                               | 26,981 (100.0)                             |
| Efavirenz                                                                  | 43,617                                       | 9766                                       |
| Non-nucleoside reverse transcriptase inhibitors                            | 9060                                         | 1983                                       |
| Protease inhibitors (excluding ritonavir)                                  | 33,760                                       | 14,857                                     |
| Integrase inhibitors                                                       | 7764                                         | 1588                                       |
| Fusion inhibitors                                                          | 278                                          | 106                                        |
| CC chemokine receptor type 5 antagonists                                   | 565                                          | 93                                         |
| AND aged $\geq 12$ years at time of first ARV prescription fill            | 89,845 (99.7)                                | 26,521 (98.3)                              |
| AND have continuous enrollment for 6 months prior to index date            | 34,004 (37.7)                                | 11,431 (42.4)                              |
| AND do not have eligibility for Medicare                                   | 34,004 (37.7)                                | 11,416 (42.3)                              |
| AND have no evidence of HIV-related ARV use prior to index date*           | 24,050 (26.7)                                | 5763 (21.4)                                |
| AND have an HIV diagnosis prior to index date* or following index date     | 19,983 (22.2)                                | 5154 (19.1)                                |
| Final study cohorts                                                        | 19,983 (100.0)                               | 5154 (100.0)                               |
| Initiated efavirenz-containing regimen                                     | 11,187 (56.0)                                | 2224 (43.2)                                |
| Initiated efavirenz-free regimen                                           | 8796 (44.0)                                  | 2930 (56.9)                                |

HIV = human immunodeficiency virus; ARV = antiretroviral.

\* Evaluated in available data starting January 1, 2004.

**Supplemental Table 2.** Additional Results for Propensity Score-Adjusted Models

|                                                                                 | Commercial Database   | Medicaid Database     |
|---------------------------------------------------------------------------------|-----------------------|-----------------------|
| <i>HRs of outcomes, treating efavirenz-free regimens as reference</i>           |                       |                       |
| PS-adjusted HR (95% CI) of suicidality                                          |                       |                       |
| ≤180 days after initiation                                                      | 0.980 (0.515–1.867)   | 0.782 (0.492–1.242)   |
| 181–365 days after initiation                                                   | 0.789 (0.136–4.586)   | 0.451 (0.104–1.949)   |
| >365 days after initiation                                                      | 0.676 (0.033–13.990)  | 0.407 (0.035–4.763)   |
| PS-adjusted HR (95% CI) of suicide attempt*                                     | NA                    | NA                    |
| PS-adjusted HR (95% CI) of suicide attempt (expanded)                           |                       |                       |
| ≤180 days after initiation                                                      | 0.856 (0.370–1.983)   | 0.419 (0.152–1.152)   |
| 181–365 days after initiation                                                   | 1.999 (0.145–27.511)  | 0.552 (0.015–20.581)  |
| >365 days after initiation                                                      | 1.143 (0.014–95.889)  | 0.941 (0.005–166.912) |
| <i>IRRs and IRDs of outcomes, treating efavirenz-free regimens as reference</i> |                       |                       |
| PS-adjusted IRR (95% CI) of suicidality                                         | 0.925 (0.559–1.548)   | 0.814 (0.546–1.202)   |
| PS-adjusted IRD (95% CI) of suicidality                                         | –20 (–250 to 180)     | –520 (–2520 to 1180)  |
| PS-adjusted IRR (95% CI) of suicide attempt                                     | 4.488 (0.566–204.425) | 0.096 (0.002–0.661)   |
| PS-adjusted IRD (95% CI) of suicide attempt*                                    | —                     | —                     |
| PS-adjusted IRR (95% CI) of suicide attempt (expanded)                          | 0.888 (0.436–1.89)    | 0.554 (0.241–1.198)   |
| PS-adjusted IRD per 100,000 PYs (95% CI) of suicide attempt (expanded)          | –20 (–200 to 130)     | –540 (–1360 to 200)   |

HR = hazard ratio; PS = propensity score; CI = confidence interval; NA = not available; IRR = incidence rate ratio; IRD = incidence rate difference; PY = person-year.

\* Models did not converge given small number of events.
